# Supplementary material
Source: PubMed Central journal article supplement (PMC4195760)
Supplement: embj0033-1767-sd1.pdf [file embj0033-1767-sd1.pdf]

**A**

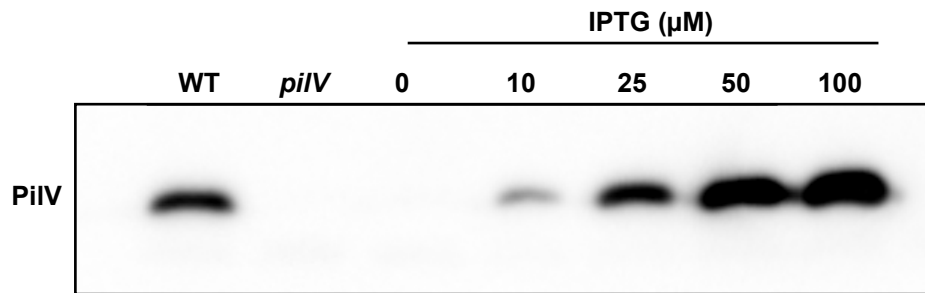

**B**

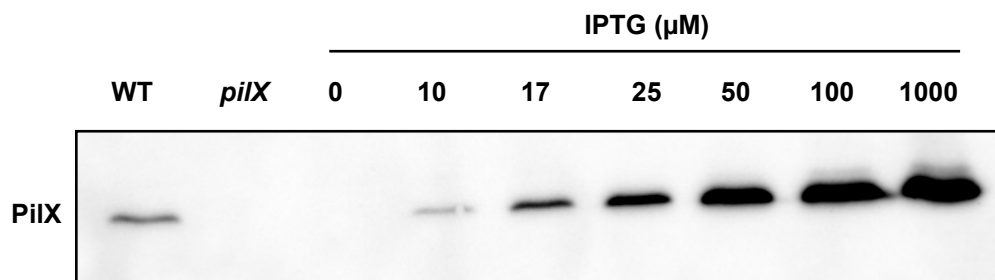

**Figure S1.** Amount of PiIV and PiIX expression in the inducible strains as a function of the concentration of IPTG. (A) Western blot using an anti-PiIV antibody. (B) Western blot using an anti-PiIX antibody. Concentration of IPTG is indicated in  $\mu\text{M}$ .
