# Supplementary material
Source: PubMed Central journal article supplement (PMC4195760)
Supplement: embj0033-1767-sd2.pdf [file embj0033-1767-sd2.pdf]

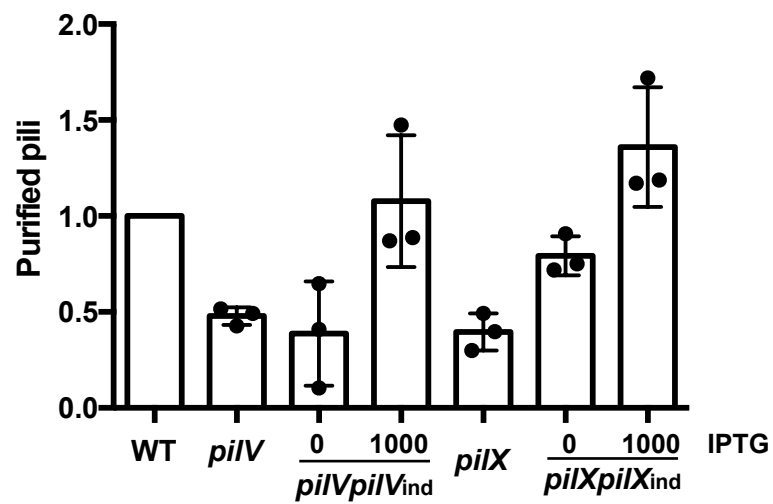

**Figure S2.** Amount of pili purified using the ammonium sulfate purification procedure for the indicated strains and growth conditions. Pili were purified and the amount of PilE protein in purified samples as well as in the initial lysate was determined by Western blot. A ratio between the amount of pilin in the pilus preparation and the total amount present in the lysate was calculated. Results are indicated relative to the wild type strain.
