# Supplementary material
Source: PubMed Central journal article supplement (PMC4195760)
Supplement: embj0033-1767-sd3.pdf [file embj0033-1767-sd3.pdf]

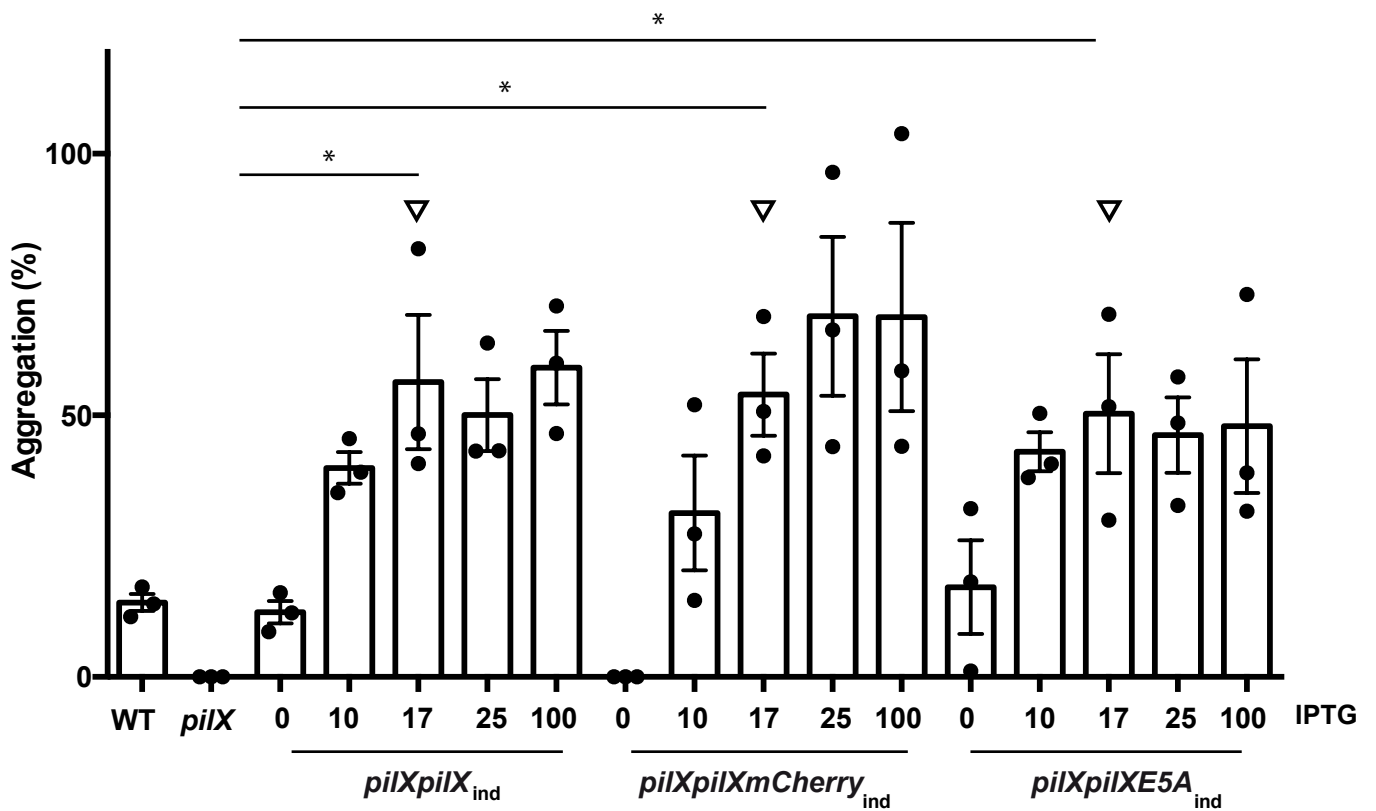

**Figure S3.** Absence of effect of the mCherry fusion and E5A mutation on the ability of PilX to mediate bacterial aggregation. Aggregation is indicated as a percentage of bacteria involved in aggregates relative to the total amount of bacteria in the suspension.
