# Supplementary material
Source: PubMed Central journal article supplement (PMC4195760)

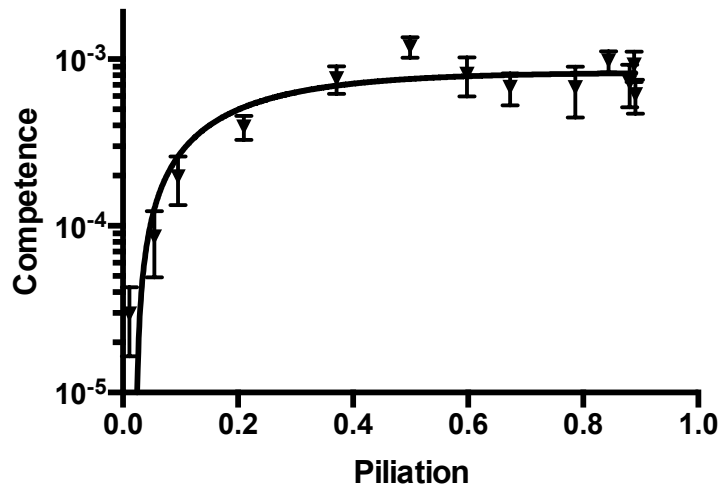

**Figure S4.** Transformation efficiency as a function of piliation level.

Supplement: embj0033-1767-sd4.pdf [file embj0033-1767-sd4.pdf]
